1 ***Cis-* and *trans-*acting factors influence expression of the *norM*-encoded efflux pump of**  
2 ***Neisseria gonorrhoeae* and levels of gonococcal susceptibility to substrate antimicrobials**

3  
4 Corinne E. Rouquette-Loughlin<sup>a</sup>, Vijaya Dhulipala<sup>a</sup>, Jennifer L. Reimche<sup>a</sup>, Erica Raterman<sup>b</sup>,  
5 Afrin A. Begum<sup>b</sup>, Ann E. Jerse<sup>b</sup>, William M. Shafer<sup>a,c,d#</sup>

6  
7 <sup>a</sup>Department of Microbiology and Immunology, Emory University School of Medicine, Atlanta,  
8 Georgia, USA

9 <sup>b</sup>Department of Microbiology and Immunology, F. Edward Hébert School of Medicine,  
10 Uniformed Services University, Bethesda, Maryland, USA

11 <sup>c</sup>The Emory Antibiotic Resistance Center, Emory University School of Medicine, Atlanta,  
12 Georgia, USA

13 <sup>d</sup>Laboratories of Bacterial Pathogenesis, VA Medical Center, Decatur, Georgia, USA

14  
15 Running Head: Transcriptional control of gonococcal *norM*

16 <sup>#</sup>Address correspondence to WM Shafer, [wshafer@emory.edu](mailto:wshafer@emory.edu)

17

18 **ABSTRACT**

19 The gonococcal NorM efflux pump exports substrates with a cationic moiety including  
20 quaternary ammonium compounds such as berberine (BE) and ethidium bromide (EB) as well as  
21 antibiotics such as ciprofloxacin and solithromycin. The *norM* gene is part of a four gene operon  
22 that is transcribed from a promoter containing a polynucleotide tract of 6 or 7 thymidines (Ts)  
23 between the -10 and -35 hexamers; the majority of gonococcal strains analyzed herein contained  
24 a T-6 sequence. Primer extension analysis showed that regardless of the length of the poly-T  
25 tract, the same transcriptional start site (TSS) was used for expression of *norM*. Interestingly, the  
26 T-6 tract correlated with a higher level of both *norM* expression and gonococcal resistance to  
27 NorM substrates BE and EB. Analysis of expression of genes downstream of *norM* showed that  
28 the product of the *tetR*-like gene has the capacity to activate expression of *norM* as well as *murB*,  
29 which encodes an acetylenolpyrolylglucosamine reductase predicted to be involved in the early  
30 steps of peptidoglycan synthesis. Moreover, loss of the TetR-like transcriptional regulator  
31 modestly increased gonococcal susceptibility to NorM substrates EB and BE. We conclude that  
32 both *cis*- and *trans*-acting regulatory systems can regulate expression of the *norM* operon and  
33 influence levels of gonococcal susceptibility to antimicrobials exported by NorM.

34

35

## 36 INTRODUCTION

37 *Neisseria gonorrhoeae* is a strict human pathogen and is the etiologic agent of the sexually  
38 transmitted infection (STI) termed gonorrhea, which is the second most prevalent bacterial STI in the  
39 United States and had a world-wide incidence in 2012 of an estimated 78 million infections (1). The  
40 gonococcus has adapted numerous strategies to survive attack by antimicrobials including classical  
41 antibiotics used in treatment of infection and those of host origin that participate in innate host defense.  
42 In this respect, gonococci use efflux pumps to resist the antimicrobial action of beta-lactam and macrolide  
43 antibiotics as well as cationic antimicrobial peptides and long-chain fatty acids (2-4). The capacity of  
44 gonococci to utilize efflux pumps to resist clinically useful antibiotics is of interest given the emergence  
45 of strains resistant to current and past front-line antibiotics (2, 5-7). The contribution of efflux pumps in  
46 aiding bacterial evasion of antimicrobials can be enhanced by mutations that de-repress expression of  
47 efflux pump-encoding genes (8). With respect to gonococci, previous work revealed that  
48 overexpression of the *mtrCDE* efflux pump operon due to *cis*- or *trans*-acting mutations can  
49 contribute to clinically relevant levels of antibiotic resistance (9, 10) and increase bacterial  
50 fitness during experimental infection of the lower genital tract of female mice presumably due to  
51 enhanced resistance to host antimicrobials (11, 12).

52 In this study, we investigated the regulation of the gonococcal *norM* gene. NorM belongs  
53 to the Multidrug And Toxic compound Extrusion (MATE) family of efflux proteins which are  
54 Na<sup>+</sup>- or H<sup>+</sup>-coupled transporters and are universally present in all living organisms (13).  
55 Gonococcal NorM is highly similar (56%) to NorM of *Vibrio parahaemolyticus* (14). We  
56 previously reported that NorM can export substrates with a cationic moiety including berberine  
57 (BE), ciprofloxacin (CIP) and ethidium bromide (EB) (15). Additionally, loss of the NorM efflux  
58 pump in multi-drug resistant strain H041 was found by Golparian *et al.* (6) to increase  
59 gonococcal susceptibility to solithromycin. Herein, we investigated *cis*- and *trans*-acting

60 regulatory mechanisms that influence *norM* expression and the consequence of such on  
61 antimicrobial resistance. Importantly, we identified a heretofore undescribed TetR-like regulator  
62 that activated the *norM* gene as well as a single-base-pair deletion that resulted in a stronger  
63 *norM* promoter.

64

## 65 **RESULTS and DISCUSSION**

66 ***Cis-acting transcriptional regulation of *norM* in *N. gonorrhoeae* and influence on***  
67 ***antimicrobial resistance.*** Bioinformatic analysis (<http://www.ncbi.nlm.nih.gov>) indicated that  
68 *norM* (NGO0395) is the first gene of an operon that also contains three downstream genes  
69 annotated as *murB* (NGO0394), which encodes a putative UDP-N-  
70 acetylenolpyruvoylglucosamine reductase involved in the initial steps of the peptidoglycan  
71 synthesis (Fig. 1A), NGO0393, which encodes a TetR-like family transcriptional regulator  
72 homolog, and NGO0392 which encodes a hypothetical protein. (Fig. 1A). Using total RNA  
73 prepared from strain FA19Str<sup>R</sup> in RT-PCR experiments, we confirmed transcriptional linkage of  
74 *norM* and *murB* as well as *murB* and *tetR* (data not shown), which supports the hypothesis that  
75 the genes form an operon. Primer extension analysis of this RNA indicated the presence of 2  
76 distinct TSSs. One TSS was located upstream of *norM* that corresponded to that described  
77 previously by Rouquette-Loughlin *et al.* (15) as well as another TSS located upstream of *tetR*.  
78 This result suggests the presence of two distinct promoters that express genes within the operon  
79 with one capable of directing transcription of the entire operon and a second driving the  
80 transcription of *tetR* and possibly NGO0392 (Fig. 1B).

81 DNA sequencing of the *norM* promoter region of strain FA19Str<sup>R</sup> revealed the presence  
82 of a stretch of 7 Ts between the -10 and -35 hexamers (Fig.1B). In order to learn if this poly-T  
83 stretch is common amongst gonococci, we performed a bioinformatic analysis of a 200 bp region  
84 upstream of the *norM* translational start codon using thirty-one gonococcal whole genome  
85 sequences that are available on-line (<http://www.ncbi.nlm.nih.gov>). This analysis revealed that  
86 the majority (77.4 %) of gonococcal strains had a stretch of 6 Ts (including strains FA1090 and  
87 certain WHO reference strains) while a minority (22.6%) of strains had 7 Ts (including strains

88 FA19 and MS11). Using a PCR-generated product, we also sequenced this *norM* upstream  
89 region from ten clinical isolates and found that nine of ten had the T-6 sequence (Table S1).  
90 Thus, we conclude that the T-6 sequence predominates in gonococci. In contrast, our analysis of  
91 whole genome sequences of eighty-six *N. meningitidis* strains that are publicly available  
92 (<http://www.ncbi.nlm.nih.gov>) revealed that eight-five (99%) have a *norM* promoter with a T-7  
93 repeat sequence (data not presented).

94 Despite the difference in T repeat length, primer extension analysis revealed the same  
95 TSS positioned upstream of the *norM* promoter was possessed by strains FA19 (T-7) and FA  
96 1090 (T-6), which was identified as a C residue located 6 bp downstream of the -10 hexamer  
97 (data not presented; summarized in Fig. 1B). The level of the *norM* transcript in strains  
98 FA19Str<sup>R</sup> and FA1090 was determined by quantitative qRT-PCR (qRT-PCR) analysis using total  
99 RNA prepared from mid- and late-logarithmic cultures, which showed that the *norM* transcript  
100 was 2.4-and 4.2-fold higher in strain FA1090 compared to that of FA19Str<sup>R</sup> at mid- and late-  
101 logarithmic phases, respectively (Fig. 2). Previous studies on the regulation of the *mtrCDE*  
102 efflux pump-encoding operon revealed that the distance between the -10 and -35 promoter  
103 hexamers can significantly influence transcription and levels of gonococcal resistance to  
104 antimicrobials exported by MtrCDE (9, 16). Guided by this work, we constructed *norM* mutants  
105 of FA1090 and FA19Str<sup>R</sup> by insertional inactivation with the non-polar *aphA-3* cassette and  
106 found that while loss of *norM* influenced gonococcal susceptibility to NorM substrates (BE and  
107 EB), the impact was greatest in strain FA1090 (T-6 promoter) compared to strain FA19Str<sup>R</sup> (T-7  
108 promoter) (Table 1). In order to determine if inactivation of *norM* would increase susceptibility  
109 of a more recent gonococcal clinical isolate displaying resistance to multiple antibiotics (6), we  
110 constructed a *norM::kan* transformant of strain H041 (T-6 promoter-Table S1). We found that

111 loss of the NorM efflux pump decreased resistance of H041 to both BE and EB (Table 1) as well  
112 as solithromycin (4-fold decrease in MIC; data not presented).

113 In order to determine the influence of the *norM* promoter T repeat sequence on  
114 gonococcal expression of the *norM* operon and resistance to NorM substrates, we exchanged the  
115 *norM* promoter region of FA19Str<sup>R</sup> with that of FA1090 by transformation. DNA sequencing of  
116 a PCR fragment from a representative transformant strain (FA19Str<sup>R</sup><sub>P<sub>norMF1090</sub></sub>) confirmed the  
117 presence of the T-6 instead of T-7 repeat element (data not presented). Importantly, FA19Str<sup>R</sup>  
118 P<sub>norMF1090</sub> displayed a 5-fold increase in expression of *norM* as assessed by qRT-PCR (Fig. 3) and  
119 displayed a two-fold increase in resistance to EB and BE compared to parental strain FA19Str<sup>R</sup>  
120 (Table 1). These combined results indicated that the length of the T-track can influence levels of  
121 gonococcal expression of *norM* and resistance to NorM substrates.

### 122 ***Trans-acting transcriptional regulation of *norM* and influence on antimicrobial resistance.***

123 Bioinformatic analysis revealed that the putative TetR-like protein (216 amino acids) encoded by  
124 a gene within the *norM* operon is highly conserved in gonococci. This finding is exemplified by  
125 100% amino acid identity of the protein that would be produced by strains FA19 and FA1090;  
126 the protein is also highly similar (97% identical) to a counterpart encoded by meningococci (data  
127 not presented). That this TetR-like protein can act as a transcriptional regulator was suggested  
128 by the presence of a helix-turn-helix DNA-binding domain at the N-terminus (amino acids 15-  
129 61). Further, the position of *tetR* downstream of *norM* suggested that the TetR-like protein  
130 might exert transcriptional control of *norM* and other genes (e.g., *murB*) in the operon. In order  
131 to test this possibility, *tetR::kan* mutants of strains FA19Str<sup>R</sup> and FA1090 were constructed and  
132 analyzed for changes in susceptibility to NorM substrates and levels of gene transcripts within  
133 the operon. We noted that with strain FA19Str<sup>R</sup>, but not FA1090, insertional inactivation of *tetR*

134 reproducibly resulted in two-fold decrease in gonococcal resistance to BE and EB (Table 1).  
135 Although the impact of loss of the TetR-like protein was modest, complementation of the  
136 FA19Str<sup>R</sup> *tetR::kan* strain with a pGCC4 construct bearing the wild-type *tetR* gene expressed at  
137 the *aspC-lctP* locus from an IPTG inducible *lac* promoter restored wild-type levels of  
138 antimicrobial susceptibility (Table 1).

139         Based on the above-described results, we used strain FA19Str<sup>R</sup> to ascertain if the TetR-  
140 like protein could regulate the *norM* operon. Results from qRT-PCR experiments indicated that  
141 loss of the TetR-like protein decreased expression of both *norM* and *murB* (Fig. 4), which is  
142 consistent with the transcriptional linkage of these genes by a promoter upstream of *norM*. To  
143 investigate if the TetR homolog could directly activate transcription of the *norM* operon, a  
144 recombinant His-tagged TetR protein was purified and employed in competitive EMSA  
145 experiments that used a radiolabeled PCR probe containing 344 bp of DNA upstream of *norM*.  
146 The results from DNA-binding experiments showed that TetR could bind to the probe in a  
147 specific manner as binding could be inhibited by the unlabeled *norM* PCR product, but not by a  
148 non-specific PCR probe (Figure 5). Thus, this gene regulator serves as a transcriptional activator  
149 of the *norM* operon.

150         As a member of the MATE family of efflux pumps, the gonococcal NorM efflux pump  
151 has the capacity to export antimicrobial quaternary ammonium compounds (ref. 15 and Table 1).  
152 The conservation of *norM* among gonococci suggests a role for NorM in the survival of  
153 gonococci. Thus, we hypothesized that NorM might also export host-derived antimicrobials and  
154 promote survival of gonococci during infection. However, using the established female mouse  
155 model of lower genital tract infection previously employed to determine the biological  
156 significance of the gonococcal MtrCDE efflux pump and cognate regulatory systems (11, 17),



157 we did not detect a fitness or survival defect of gonococci (FA19Str<sup>R</sup> and FA1090) bearing a null  
158 mutation in *norM* when competed with the wild-type parent strains (Figure S1). It is important  
159 to note that this model may not fully recapitulate the repertoire of antimicrobials present at  
160 human female or male mucosal surfaces. Moreover, the infection model employed is limited to  
161 the lower genital tract of female mice and distinct antimicrobials in the upper tract that might  
162 serve as NorM substrates could exist. For instance, differences in the presence and level of  
163 antimicrobial peptides have been reported at mucosal surfaces of the human ectocervix and  
164 endocervix (18). Hence, the possibility that NorM promotes survival of gonococci during human  
165 infection by promoting resistance to a host antimicrobial cannot be discounted.

166         As with other bacterial efflux pump-encoding genes (8, 9, 16), we conclude that the  
167 gonococcal *norM* gene is subject to transcriptional control that influences its expression and  
168 levels of bacterial resistance to antimicrobials that can be exported by NorM. It is of interest that  
169 both *cis*- and *trans*-acting regulatory processes identified in this study can modulate expression  
170 of *norM* and that these regulatory schemes seem dependent on the length a poly-T tract in the  
171 *norM* promoter. The majority of gonococci contain a T-6 tract in the promoter that seems to  
172 enhance transcription of *norM*. In contrast, strain FA19, which we have used extensively in our  
173 work on gonococcal efflux pumps (3, 4, 15-19), is representative of the minority of gonococcal  
174 strains harboring a T-7 sequence. Since mutations that increase or decrease spacing between the  
175 -10 and -35 hexamers can influence the fidelity of gene expression due to impacting interactions  
176 of RNA polymerase, as has been observed with nucleotide deletions or insertions within the  
177 *mtrR* promoter (16, 19), it is likely that the single T difference can impact *norM* expression in  
178 gonococcal strains with a T-6 or T-7 sequence by influencing promoter recognition by RNA  
179 polymerase.

180           In addition to this *cis*-acting regulatory mechanism, the TetR-like protein encoded by a  
181 gene within the *norM* operon can influence expression of *norM* in strain FA19. Importantly, the  
182 TetR DNA-binding protein also activates expression of *murB*, which is consistent with its  
183 transcriptional linkage with *norM*. It is of interest that a gene (*murB*) encoding an enzyme  
184 involved in the earliest steps of peptidoglycan biosynthesis (19) is co-regulated with *norM* by  
185 both *cis*- and *trans*-acting regulatory schemes. Thus, the fidelity of early stages of peptidoglycan  
186 biosynthesis may be modulated by transcriptional control systems that also influence expression  
187 of *norM* and levels of gonococcal resistance to antimicrobials exported by NorM.

188           The chemical characteristics of known substrates of the gonococcal NorM efflux pump  
189 suggest that the clinical efficacy of future antimicrobials having similar properties may be  
190 influenced by constitutive or inducible changes in *norM* expression. We hypothesize that  
191 increased expression of *norM* coupled with other mutations could result in clinical resistance to  
192 antibiotics used in the future for treatment of gonorrhea. Based on earlier work with multidrug  
193 resistant strain H041 by Golparian et al (6) and our findings with this clinical isolate, this  
194 possibility should be considered for solithromycin and its future use in treatment of gonorrhea.  
195 In a broader sense, de-repression of bacterial efflux pump genes due to constitutive mutations as  
196 well as inducible activation systems should be considered as a contributing factor by which  
197 gonococci (or other bacteria) might develop clinical resistance to antibacterials under  
198 development.

199

## 200 MATERIALS AND METHODS

201 **Gonococcal strains, growth conditions, and determination of susceptibility to antimicrobial**  
202 **agents.** Strains FA19, FA19Str<sup>R</sup> and FA 1090 were the primary gonococcal strains used in this  
203 study. These strains and their genetic derivatives as well as their susceptibility to antimicrobials  
204 are presented in Table 1. We also sequenced the *norM* promoter region from ten clinical isolates  
205 (Table S1, see below). Gonococcal strains were grown overnight at 37°C under 5 % (v/v) CO<sub>2</sub> on  
206 GCB agar containing defined supplements I and II (9). Susceptibility of test strains to antibiotics  
207 was performed by the agar dilution method and reported as the minimal inhibitory concentration  
208 (MIC) (21). IPTG was added a final concentration of 1 mM to MIC plates to allow  
209 complementation by the pGCC4 vector (22). Antibiotics were purchased from Sigma Chemical  
210 Co. (St. Louis, MO). Solithromycin was obtained from Med Chem Express (Monmouth, NJ).  
211 *Escherchia coli* strains were grown overnight at 37°C on LB agar.

212 **Sequencing of the *norM* promoter.** The *norM* promoter region was PCR-amplified from  
213 gonococci using primers norMPac1 (5'-GATCTTAATTAACAATGCCGTC AAGTCGTTAAA-  
214 3') and N10 (5'-CATCACGGTATCGACGAAACGATGCCC-3'). The resulting PCR product  
215 was sequenced using norMPac1.

216 **Construction of the *norM* and *tetR*-negative mutants and their complemented strains.** The  
217 pBAD*norM::kan* construct (15) was transformed into FA19Str<sup>R</sup> and transformants were selected  
218 on GC agar supplemented with 50 µg/ml of kanamycin (Kan). FA19Str<sup>R</sup> *norM::kan*  
219 transformants were verified by PCR and sequencing. The pGCC3 vector (22) was used to  
220 complement FA19Str<sup>R</sup> *norM::kan*. This complementation system allows the integration of a  
221 wild-type copy of *norM* under its own promoter at the transcriptionally silent intergenic region  
222 between *lctP* and *aspC*. norMPac1 and norMpme1 (5'-

223 GATCGTTTAAACTATCGGATGGGTTGCATGGT -3') were used to amplify the *norM* gene  
224 and its own promoter. The resulting PCR product was cloned into the pGCC3 vector. The  
225 pGCC3*norM* construct was verified by sequencing and then transformed into FA19Str<sup>R</sup>  
226 *norM::kan*. FA19Str<sup>R</sup> *norM::kanC3* transformants were selected on GC agar plates  
227 supplemented with 1 µg/ml of erythromycin (Ery) and verified by colony PCR and sequencing.  
228 The *norM* gene from FA1090 was amplified using N6 (5'-TCGGTATCGGATGGGTTGC-3')  
229 and N4 (5'-ATGCTGCTCGACCTCGACC-3') primers, the resulting PCR product was cloned  
230 into pBAD. pBAD*norM* was then digested by NaeI and a non-polar Kan-resistance cassette  
231 from pUC18K (23) was inserted. The resulting construct was transformed into FA1090 and  
232 transformants were selected on GC agar plates supplemented with 50 µg/ml of kan. FA  
233 1090*norM::kan* transformants were verified by colony PCR and sequencing. To construct the  
234 *tetR*-negative mutant, pUC19 vector was digested by BamHI and EcoRI and PCR was  
235 performed on FA19 genomic DNA with E1tetR (5'-  
236 GGAATTCCTGTATGGGCAGGTTGATGTC-3') and Sma1R (5'-  
237 TCCCCGGGGGATCGCCCAACAATTCGGCAC-3') primers and B1tetR (5'-  
238 CGCGGATCCGCGCTGAAGGGCTTCCAAATCGG-3') and Sma1F (5'-  
239 TCCCCGGGGGAACACAATACCTTTACCCAAGC-3'). The resulting PCR products were  
240 ligated into pUC9 digested with BamHI and EcoRI digested to create a SmaI site 356 bp  
241 downstream the ATG of the *tetR* gene. The resulting construct was verified by PCR and then  
242 digested by SmaI. The Kan-resistance cassette was PCR-amplified with pfu using AphF (5'-  
243 GTGACTAACTAGGAGGAATAAAT-3') and AphR (5'-GGTCATTATCCCTCCAGGTA-  
244 3') primers and pUC18K (22) as a template. The kan cassette was then cloned into the SmaI  
245 digested pUC19*tetR*. The ligation reaction was transformed into *E. coli* DH5α and transformants

246 were selected on LB agar plates supplemented with 50 µg/ml of Kan. The resulting construct  
247 was then verified by sequencing and used to transform strains FA19Str<sup>R</sup> and FA1090 for  
248 resistance to Kan (50 µg/ml). The pGCC4 vector was used to complement FA19Str<sup>R</sup>*tetR::kan*.  
249 This complementation system allows the integration of a wild-type copy of *tetR* under an IPTG  
250 inducible promoter at the transcriptionally silent intergenic region between *lctP* and *aspC*.  
251 tetRpac1 (5'- GATCTTAATTAAGCCTGTAAATCCAAGGAGTA  
252 -3') and tetRpme1 (5'- GATCCGTTTAAACCGTCTGAAGGCTGATTCCGG-3') were used to  
253 amplify the *tetR* gene. The resulting PCR product was cloned into the pGCC4 vector. The  
254 pGCC4*tetR* construct was verified by sequencing and then transformed into FA19Str<sup>R</sup>*tetR::kan*.  
255 Transformant FA19Str<sup>R</sup>*tetR::kanC4* was obtained by selection with 1 µg/ml of chloramphenicol  
256 (CMP) and the genotype was verified by colony PCR.

257 **Construction of FA19Str<sup>R</sup><sub>P<sub>norMFA1090</sub></sub>.** Primers N5 (5'- GGATGAACATCGGCACCTTG-3')  
258 and norMPac1 (5'- GATCTTAATTAACAATGCCGTCAAGTCGTTAAA -3') were used to  
259 amplify the *norM* promoter region of strain FA 1090. The resulting 1385 bp PCR product was  
260 then transformed into strain FA19Str<sup>R</sup> and transformants were selected on GC agar containing  
261 defined supplements I and II supplemented with EB (1µg/ml). Transformants were then verified  
262 by DNA sequencing of a PCR product generated using primers N5 and norMPacI.

263 **Mapping transcriptional start sites by primer extension analysis.** Total RNA from strains  
264 FA19 and FA1090 was prepared at late-logarithmic phase of growth in GC broth as described  
265 above by the TRIzol method as directed by the manufacturer (Thermo Fisher Scientific,  
266 Waltham, MA). Primer extension experiments were performed as described previously (9, 16) on  
267 6 µg of total RNA with primer N11 (5'-CGGTCAGCAGGCGGATTTCTTTCAGG-3') for *norM*  
268 and primer tetRPE (5'- TGGCGTTCGATGATGCGGG-3') for *tetR*. The AMV Reverse

269 Transcriptase Primer Extension transcription start sites (TSSs) were determined by  
270 electrophoresis of the extension products on a 6% (w/v) DNA sequencing acrylamide gel  
271 adjacent to reference sequencing reactions.

272 **Qualitative and quantitative RT-PCR.** For RT-PCR and qRT-PCR analyses of transcript  
273 levels, RNA was extracted from strains FA19Str<sup>R</sup>, FA1090, their respective *norM*-negative and  
274 *tetR*-negative mutants and FA19Str<sup>R</sup><sub>P<sub>nor</sub>MFA1090</sub> grown in GCB plus supplements to mid and late  
275 logarithmic phases by the TRIzol method as directed by the manufacturer (Thermo Fisher  
276 Scientific, Waltham, MA). Genomic DNA (gDNA) was removed by RNase-free DNase  
277 treatment and gDNA Wipeout (Qiagen, Germantown, MD). The resulting RNA was then reverse  
278 transcribed to cDNA using the QuantiTect Reverse Transcriptase kit (Qiagen). Quantitative real-  
279 time RT-PCR was performed using the generated cDNA and results were normalized to 16S  
280 rRNA expression for each strain. Primers 16Smai\_qRTF (5'-  
281 CCATCGGTATTCCTCCACATCTCT-3') and 16Smai\_qRTR (5'-  
282 CGTAGGGTGCGAGCGTTAATC-3') were used for the 16S rRNA while primers tetR\_qRTR  
283 (5'- TTCCACATCAGAGGGCAACA-3') and tetR\_qRTF (5'- GCAACATCAGCACCAACCAT  
284 -3') were used for the *tetR* gene. Primers N4 and N10 (5'-  
285 CATCACGGTATCGACGAAACCGATGCCC-3') were used for the *norM* gene. Primers  
286 murB\_qRTF (5'- TAAACACGCCGACGAATTGC-3') and murB\_qRTR (5'-TCTCGCGTA  
287 TGCCCTTGTTT-3') were used for the *murB* gene. All qRT-PCRs were performed in  
288 experimental duplicates and biological triplicates. For RT-PCR, random hexamers were used for  
289 the reverse transcription while murB\_qRTF and tetRSma1R (5'-  
290 TCCCCCGGGGATCGCCCAACAATTCGGCAC-3'), N8 (5'-  
291 CCGTTCGGACTGACAGCG-3') and murB\_qRTR were used for PCRs on the cDNA.

292 **Purification of the TetR protein.** Construction of pET15b*tetR* was done by amplifying the *tetR*  
293 open reading frame using the primers pET*tetR*\_F (5'- TCGATCCATATGCCCGTGACCCG  
294 CATTG-3') and pET*tetR*\_R (5'-GATCGGATCCTTACGGGTTGCCGTTGCCG -3'). The  
295 resulting PCR product along with the pET15b vector were digested with NdeI and BamHI,  
296 ligated overnight and transformed into *E. coli* DH5 $\alpha$ . The pET15b*tetR* construct was confirmed  
297 by sequencing with vector-specific primers T7F (5'-TTAATACGACTCACTATAGG-3') and  
298 T7R (5'-GCTAGTTATTGCTCAGCGG-3'). For protein expression, pET15b*tetR* was  
299 transformed into *E. coli* BL21 (DE3) cells. Cultures (5 ml) of BL21 (DE3)-pET15b*tetR* were  
300 grown overnight at 30°C and added to 500 ml of LB broth the next morning. The culture was  
301 grown at 30°C until mid-log phase and then induced with 0.3 mM IPTG and grown overnight at  
302 30°C. Cells were harvested and resuspended in 20 ml of 10 mM Tris, pH 7.5, 200 mM NaCl, and  
303 EDTA-free protease inhibitor was added to bacterial suspension. The cells were lysed by use of a  
304 French press cell as described (24), membranes and unbroken cells were removed by  
305 centrifugation at 100,000 x g, and the supernatant was collected and filtered. TetR-His was  
306 purified over a 2-ml nickel-nitrilotriacetic acid (Ni<sup>+2</sup>-NTA) column. After flowing the  
307 supernatant over the Ni<sup>+2</sup>-NTA column, the resin was washed successively with buffer  
308 containing 20 mM and 50 mM imidazole to remove contaminants and weakly bound proteins,  
309 and TetR-His was eluted successively with buffer containing 100 and 200 mM imidazole. The  
310 fractions containing TetR-His were concentrated and the imidazole-containing buffer was  
311 removed by dialysis into storage buffer (10 mM Tris-HCl, pH 7.5, 200 mM NaCl, and 1 mM  
312 EDTA). Dithiothreitol and glycerol were added to a final concentration of 1 mM and 10 % (w/v),  
313 respectively.

314 **Electrophoretic mobility shift assay (EMSA).** DNA probe encompassing the *norM* promoter  
315 region was amplified by PCR from FA19 genomic DNA using the upstream primers N11 (5'-  
316 CGGTCAGCAGGCGGATTTCTTTCAGG -3') or N14 (5'-TCTGCCTTCTGTTTTATCCTG -  
317 3'). When making radioactive probes, the indicated PCR products were labeled with [ $\gamma^{32}\text{P}$ ]-dATP  
318 using T4 polynucleotide kinase (New England Biolabs). The labeled DNA fragments were  
319 incubated with 8  $\mu\text{g}$  of TetR-His in 30  $\mu\text{l}$  of reaction buffer at room temperature. For the  
320 competition assays, the same non-labelled probe or a non-labelled PCR product using rnpBF1  
321 (5'-CGGGACGGGCAGACAGTCGC-3') and rnpBR1 (5'-  
322 GGACAGGCGGTAAGCCGGGTTC-3') primers were added in the reaction. Samples were  
323 subjected to electrophoresis in a 6% native polyacrylamide gel at 4  $^{\circ}\text{C}$ , followed by  
324 autoradiography as described (24).

325 **Competitive infection of female mice to measure gonococcal fitness.** The female mouse  
326 model of lower genital tract infection was used to assess whether loss of NorM imposed an in  
327 vivo fitness cost or benefit. Mice were inoculated vaginally with an equal number of colony  
328 forming units of parent strains FA19Str<sup>R</sup> and FA1090 with their respective their *norM::kan*  
329 transformants and the relative numbers of mutant and wild-type bacteria recovered were  
330 compared. The details of the experimental procedures have been described (11, 12, 24). Animal  
331 experiments were conducted in the laboratory animal facility at USUHS, which is fully  
332 accredited by the Association for the Assessment and Accreditation of Laboratory Animal Care,  
333 under a protocol approved by the USUHS Institutional Animal Care and Use Committee.

334

335



336

337

338

339 **ACKNOWLEDGEMENTS**

340 The contents of this article are solely the responsibility of the authors and do not necessarily  
341 reflect the official views of the National Institutes of Health, the U.S. Department of Veterans  
342 Affairs, or the United States government.

343 We have no competing interest to declare.

344 We thank C. del Rio, J. Dillon, R. Nicholas and M. Unemo for providing clinical isolates.

345 **FUNDING INFORMATION**

346 This work was supported by NIH grants R37AI21150-32 (W.M.S), U19 AI113170-04 (A.E.J),  
347 and in part by VA Merit Award 510 1BX000112-07 (W.M.S.) from the Biomedical Laboratory  
348 Research and Development Service of the U.S. Department of Veterans Affairs. W.M.S. is the  
349 recipient of a Senior Research Career Scientist Award from the Biomedical Laboratory Research  
350 and Development Service of the U.S. Department of Veterans Affairs.

351

352 **REFERENCES**

- 353 1. Newman L, Rowley J, Vander Hoorn S, Saman Wijesooriya N, Unemo M, Low N,  
354 Stevens G, Gottlieb S, Kiarie J, Temmerman M. 2015. Global estimates of the prevalence  
355 and incidence of four curable sexually transmitted infections in 2012 Based on  
356 systematic review and global reporting. PLoS ONE 10(12).
- 357 2. Unemo M, Shafer WM. 2014. Antimicrobial Resistance in *Neisseria gonorrhoeae* in the  
358 21st Century—Past, Evolution and Future. Clin Microbiol Rev. 27(3):587-613.
- 359 3. Shafer WM, Qu X-D, Waring AJ, Lehrer RI. 1998. Modulation  
360 of *Neisseria gonorrhoeae* susceptibility to vertebrate antibacterial peptides  
361 due to a member of the resistance/nodulation/division efflux pump family.  
362 Proc. Natl. Acad. Sci. USA 95:1829–1833.
- 363 4. Lee EH, and Shafer WM. 1999. The *farAB*-encoded efflux pump mediates  
364 resistance of gonococci to long-chained antibacterial fatty acids. Mol.  
365 Microbiol. 33:839–845.
- 366 5. Fifer H, Natarajan U, Alexander S, Hughes G, Golparian D, Unemo M. 2016. Failure of  
367 dual antimicrobial therapy in treatment of gonorrhea. N Engl J Med 374: 25.
- 368 6. Golparian D, Shafer WM, Ohnishi M, Unemo M. 2014. Importance of multi-drug efflux  
369 pumps in the antimicrobial resistance property of clinical multi-drug resistant isolates of  
370 *Neisseria gonorrhoeae*: rationale for targeting efflux systems for drug development.  
371 Antimicrob. Agents Chemother. 58:3556-3559.

372

- 373 7. Unemo M, Del Rio C, Shafer WM. 2016. Antimicrobial Resistance Expressed by  
374 *Neisseria gonorrhoeae*: A Major Global Public Health Problem in the 21st Century.  
375 *Microbiol Spectr.* 4:EI10-0009-2015.[https://doi.org/10.1128/microbiolspec.EI10-0009-](https://doi.org/10.1128/microbiolspec.EI10-0009-2015)  
376 2015.
- 377 8. Weston N, Sharma P, Ricci V, Piddock LJV. 2017. Regulation of the AcrAB-TolC efflux  
378 system in *Enterobacteriaceae*. *Res Microbiol.* pii: S0923-2508(17)30176-6. doi:  
379 10.1016/j.resmic.2017.10.005.
- 380 9. Hagman, KE, Pan W, Spratt BG, Balthazar JT, Judd RC, Shafer WM. 1995. Resistance  
381 of *Neisseria gonorrhoeae* to antimicrobial hydrophobic agents is modulated by the  
382 *mtrRCDE* efflux system. *Microbiology* 141: 611–622.
- 383 10. Veal WL, Nicholas RA, Shafer WM. 2002. Overexpression of the MtrC-MtrD-MtrE  
384 efflux pump due to an *mtrR* mutation is required for chromosomally mediated penicillin  
385 resistance in *Neisseria gonorrhoeae*. *J Bacteriol.* 184(20):5619-24.
- 386 11. Warner DM, Folster JP, Shafer WM, Jerse AE. 2007. Regulation of the MtrC-MtrD-MtrE  
387 efflux-pump system modulates the *in vivo* fitness of *Neisseria gonorrhoeae*. *J Infect Dis.*  
388 196(12):1804-12.
- 389 12. Warner DM, Shafer WM, Jerse AE. 2008. Clinically relevant mutations that cause  
390 derepression of the *Neisseria gonorrhoeae* MtrC-MtrD-MtrE efflux pump system confer  
391 different levels of antimicrobial resistance and *in vivo* fitness. *Mol. Microbiol.* 70:462-  
392 478.
- 393 13. Kuroda T, Tsuchiya T. 2009. Multidrug efflux transporters in the MATE family.  
394 *Biochim Biophys Acta.* 1794(5):763-8. doi: 10.1016/j.bbapap.2008.11.012. Epub 2008  
395 Dec 6. Review. PMID:19100867

- 396 14. Morita, Y, Kodama K, Shiota S, Mine ST, Kataoka A, Mizushima T, Tsuchiya T. 1998.  
397 NorM, a putative multidrug efflux protein, of *Vibrio*  
398 *parahaemolyticus* and its homolog in *Escherichia coli*. Antimicrob. Agents  
399 Chemother. 42:1778–1782.
- 400 15. Rouquette-Loughlin C, Dunham SA, Kuhn M, Balthazar JT, Shafer WM. 2003. The  
401 NorM efflux pump of *Neisseria gonorrhoeae* and *Neisseria meningitidis* recognizes  
402 antimicrobial cationic compounds. J Bacteriol. 185(3):1101-6.
- 403 16. Hagman K E, and WM Shafer. 1995. Transcriptional control of the *mtr*  
404 efflux system of *Neisseria gonorrhoeae*. J. Bacteriol. 171:4162–4165.
- 405 17. Jerse AE, Sharma ND, Simms AN, Crow ET, Snyder LA, Shafer WM. 2003. A  
406 gonococcal efflux pump system enhances bacterial survival in a female mouse model of  
407 genital tract infection. Infect Immun.71: 5576-82.
- 408 18. Burgener A, Tjerlund A, Kaldensjo T, Abou M, McCorrister S, Westmacott GR, Mogk  
409 K, Ambrose E, Broliden K, Ball B. 2013. A systems biology evaluation of the human  
410 female genital tract shows compartmentalization of immune factor expression. J. Virol.  
411 87 (9): 5141-5150.
- 412 19. Zarantonelli L, Borthagaray G, Lee EH, Veal W, Shafer WM. 2001. Decreased  
413 susceptibility to azithromycin and erythromycin mediated by a novel *mtrR* promoter  
414 mutation in *Neisseria gonorrhoeae*. J Antimicrob Chemother. 47: 651-4.
- 415 20. Mizved S, Oddone A, Byczynski B, Hugues DW, Berti PJ. 2005. UDP-N-acetylmuramic  
416 acid (UDP-MurNAc) is a potent inhibitor of MurA (Enolpyruvyl-UDP-GlcNAc  
417 synthase). Biochemistry. 44: 4011-4017.

- 418 21. Sarubbi FA Jr, Blackman E, Sparling PF. 1974. Genetic mapping of linked antibiotic  
419 resistance loci in *Neisseria gonorrhoeae*. *J. Bacteriol.* 120(3):1284-92.
- 420 22. Skaar EP, Lecuyer B, Lenich AG, Lazio MP, Perkins-Balding D, Seifert HS, Karls AC.  
421 2005. Analysis of the Piv recombinase-related gene family of *Neisseria gonorrhoeae*. *J.*  
422 *Bacteriol.* 187:1276–1286.
- 423 23. Ménard R, Sansonetti PJ, Parsot C. 1993. Nonpolar mutagenesis of the *ipa* genes defines  
424 IpaB, IpaC, and IpaD as effectors of *Shigella flexneri* entry into epithelial cells. *J.*  
425 *Bacteriol.* 175:5899-5906.
- 426 24. Rouquette-Loughlin CE, Zalucki YM, Dhulipala VL, Balthazar JT, Doyle RG, Nicholas  
427 RA, Begum AA, Raterman EL, Jerse AE, Shafer WM. 2017. Control of *gdhR*  
428 expression in *Neisseria gonorrhoeae* by autoregulation and a master repressor (MtrR) of  
429 a drug efflux pump operon. *mBio.* 8 (2): e00449-17.
- 430
- 431
- 432
- 433

434 **FIGURE LEGENDS**

435 **FIG 1** A. The organization of the *norM* operon is depicted. The length and transcriptional  
436 direction (arrows) of the genes are shown. B. Sequences of the *norM* and *tetR* promoter regions  
437 from strains FA19 and FA 1090. The -10 and -35 hexamers are indicated, and \* represents the  
438 TSS.

439 **FIG 2.** Quantitative RT-PCR results with *norM* in strains FA19Str<sup>R</sup> and strain FA 1090 at mid-  
440 and late-logarithmic phases of growth. Error bars represent standard deviations from the means  
441 of 3 independent experiments. Normalized Expression Ratios (NER) were calculated using 16S  
442 rRNA expression. \* $p=0.018$ , \*\* $p=0.004$  for comparison of values of FA1090 vs. FA19Str<sup>R</sup>. The  
443 statistical significance was determined by Student's *t*-test.

444 **FIG 3.** Quantitative RT-PCR results with *norM* in strains FA19Str<sup>R</sup> and strain FA19Str<sup>R</sup><sub>P<sub>norM1090</sub></sub>  
445 at mid -logarithmic phase of growth. Error bars represent standard deviations from the means of  
446 3 independent experiments. Normalized Expression Ratios (NER) were calculated using 16S  
447 rRNA expression. \* $p=0.01$ . The statistical significance of the results was determined by  
448 Student's *t*-test.

449 **FIG 4.** Quantitative RT-PCR results with *norM* and *murB* in strains FA19Str<sup>R</sup> and strain  
450 FA19Str<sup>R</sup><sub>*tetR::kan*</sub> at mid-logarithmic phase of growth. Error bars represent standard deviations  
451 from the means of 3 independent experiments. Normalized Expression Ratios (NER) were  
452 calculated using 16S rRNA expression. \* $p=0.0004$ , \*\* $p=0.022$  for comparison of values of  
453 FA19Str<sup>R</sup><sub>*tetR::kan*</sub> vs. FA19Str<sup>R</sup>. The statistical significance of the results was determined by  
454 Student's *t*-test.

455

456 **FIG 5.** Competitive EMSA demonstrating binding specificity. The purified TetR-His protein  
457 binds to the *norM* promoter from strain FA19 in a specific manner. Lane 1, hot probe N11/N14\*  
458 alone; lane 2, hot probe N11/N14\* plus 8  $\mu$ g of TetR-His; lanes 3 to 5, hot probe N11/N14\* plus  
459 8  $\mu$ g of TetR-His plus 100X, 200X and 400X respectively of unlabeled N11/N14; lanes 6 to 8,  
460 hot probe N11/N14\* plus 8  $\mu$ g of TetR-His plus 100X, 200X and 400X respectively of unlabeled  
461 *mnpB*.

462 **TABLE 1. Susceptibility of gonococcal strains to NorM substrates**

463

464 MIC ( $\mu\text{g/ml}$ )<sup>a</sup>

465

| 466 Strains                                            | BE <sup>b</sup> | EB    |
|--------------------------------------------------------|-----------------|-------|
| 467                                                    |                 |       |
| 468 FA19Str <sup>R</sup>                               | 5               | 1.25  |
| 469 FA19Str <sup>R</sup> <i>norM::kan</i>              | 1.25            | 0.625 |
| 470 FA19Str <sup>R</sup> <i>norM::kanC3</i>            | 5               | 1.25  |
| 471 FA19Str <sup>R</sup> <i>tetR::kan</i>              | 2.5             | 0.625 |
| 472 FA19Str <sup>R</sup> <i>tetR::kanC4</i>            | 5               | 1.25  |
| 473 FA19Str <sup>R</sup> <sub><i>P</i>norMFA1090</sub> | 10              | 2.5   |
| 474                                                    |                 |       |
| 475 FA 1090                                            | 20              | 5     |
| 476 FA 1090 <i>norM::kan</i>                           | 1.25            | 0.625 |
| 477 FA 1090 <i>tetR::kan</i>                           | 20              | 5     |
| 478                                                    |                 |       |
| 479 HO41                                               | >40             | 20    |
| 480 HO41 <i>norM::kan</i>                              | 10              | 1.25  |

481

482 <sup>a</sup>All results are representative from 3 or more independent determinations

483 <sup>b</sup>BE: berberine; EB: Ethidium bromide

484

485

486

487

488

489





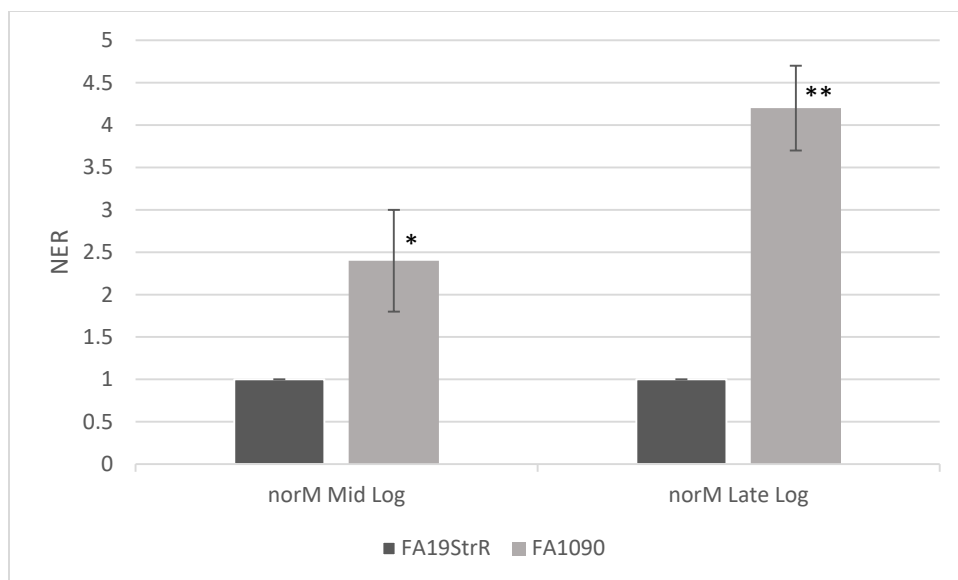

506  
507 **FIG 2.** Quantitative RT-PCR results with *norM* in strains FA19Str<sup>R</sup> and strain FA 1090 at mid-  
508 and late-logarithmic phases of growth. Error bars represent standard deviations from the means  
509 of 3 independent experiments. Normalized Expression Ratios (NER) were calculated using 16S  
510 rRNA expression. \* $p=0.018$ , \*\* $p=0.004$  for comparison of values of FA1090 vs. FA19Str<sup>R</sup>. The  
511 statistical significance was determined by Student's *t*-test.

512

513

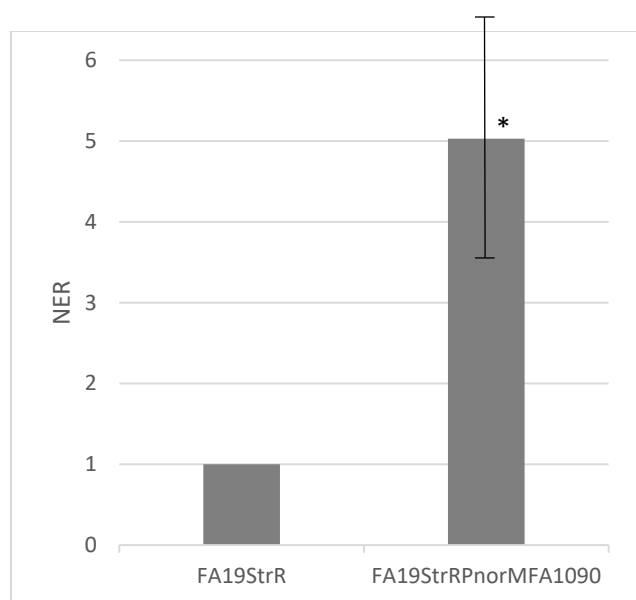

514  
515 **FIG 3.** Quantitative RT-PCR results with *norM* in strains FA19Str<sup>R</sup> and strain FA19Str<sup>R</sup><sub>PnorM1090</sub>  
516 at mid -logarithmic phase of growth. Error bars represent standard deviations from the means of  
517 3 independent experiments. Normalized Expression Ratios (NER) were calculated using 16S  
518 rRNA expression. \**p*=0.01. The statistical significance of the results was determined by  
519 Student's *t*-test.

520

521

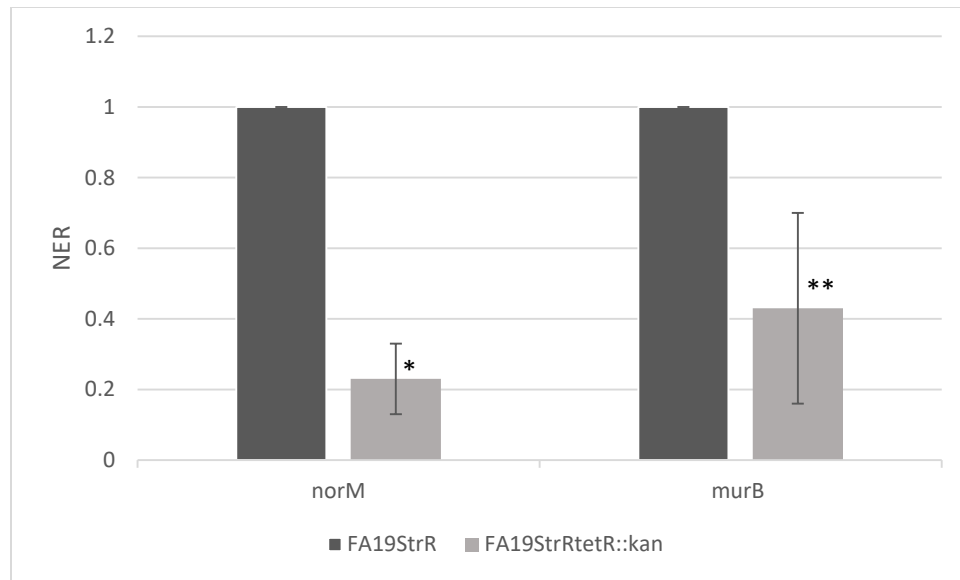

522

523

524 **FIG 4** Quantitative RT-PCR results with *norM* and *murB* in strains FA19Str<sup>R</sup> and strain

525 FA19Str<sup>R</sup>*tetR::kan* at mid-logarithmic phase of growth. Error bars represent standard deviations

526 from the means of 3 independent experiments. Normalized Expression Ratios (NER) were

527 calculated using 16S rRNA expression. \* $p=0.0004$ , \*\* $p=0.022$  for comparison of values of

528 FA19Str<sup>R</sup>*tetR::kan* vs. FA19Str<sup>R</sup>. The statistical significance of the results was determined by

529 Student's *t*-test.

530

531

532

533  
534  
535  
536  
537  
538  
539  
540  
541

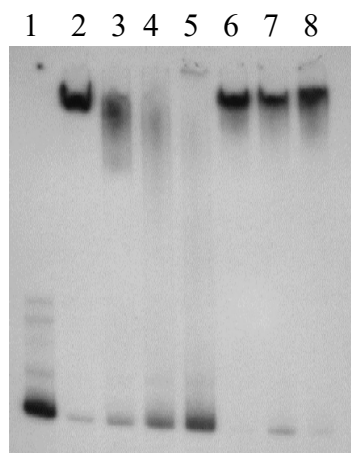

542  
543  
544  
545  
546  
547  
548  
549

**FIG 5.** Competitive EMSA demonstrating binding specificity. The purified TetR-His protein binds to the *norM* promoter from strain FA19 in a specific manner. Lane 1, hot probe N11/N14\* alone; lane 2, hot probe N11/N14\* plus 8 µg of TetR-His; lanes 3 to 5, hot probe N11/N14\* plus 8 µg of TetR-His plus 100X, 200X and 400X respectively of unlabeled N11/N14; lanes 6 to 8, hot probe N11/N14\* plus 8 µg of TetR-His plus 100X, 200X and 400X respectively of unlabeled *rnpB*.

550  
551  
552  
553  
554  
555

556 **TABLE S1**

557

| 558 | <b>Strain</b> | <b>poly-T sequence in <i>norM</i> promoter</b> | <b>Source</b>            |
|-----|---------------|------------------------------------------------|--------------------------|
| 559 | H041          | 6                                              | R. Nicholas <sup>a</sup> |
| 560 | F89           | 6                                              | R. Nicholas              |
| 561 | NYC-201409-05 | 6                                              | C. del Rio <sup>b</sup>  |
| 562 | NYC-201411-12 | 6                                              | C . del Rio              |
| 563 | NYC-201411-06 | 6                                              | C . del Rio              |
| 564 | AZM LLR1      | 6                                              | M. Unemo <sup>c</sup>    |
| 565 | AZM LLR2      | 6                                              | M. Unemo                 |
| 566 | AZM LLR3      | 6                                              | M. Unemo                 |
| 567 | SK33414       | 6                                              | J. Dillon <sup>d</sup>   |
| 568 | SK1902        | 7                                              | J. Dillon                |

569

570 <sup>a</sup> University of North Carolina-Chapel School of Medicine, Chapel Hill, NC; <sup>b</sup> Emory University  
571 School of Medicine, Atlanta, GA; <sup>c</sup> Orebro Hospital, Orebro, Sweden; <sup>d</sup> University of  
572 Saskatchewan, Saskatoon, Canada

573

574 **FIG S1.** Mutation of *norM* did not alter the *in vivo* fitness of *N. gonorrhoeae* strain FA19 or  
575 FA1090 in the female mouse model of gonorrhoea infection. Mice were inoculated vaginally with  
576 similar numbers of wild-type bacteria and the mutant or complemented mutant strains. Results  
577 are expressed as the competitive index (CI) for each mouse on each culture day (CI =1, equal  
578 competition; CI <1, mutant strain attenuated; CI >1, mutant strain out-competed the wild-type  
579 strain). The geometric mean of the CI values is shown and is represented by the bars. Open  
580 circles indicate that only the mutant strain was recovered from the vaginal swabs at the indicated  
581 time point. Open triangles indicate that only the wild-type strain was recovered from the vaginal  
582 swabs at the indicated time point. A. The FA19Str<sup>R</sup> *norM::kan* mutant and B. FA19Str<sup>R</sup>  
583 *norM::kanC3* complemented mutant exhibited similar fitness as wild-type FA19Str<sup>R</sup> bacteria in  
584 *vivo*. Pairwise analyses of competitive indices from days 1, 3, and 5 of the FA19Str<sup>R</sup> vs.  
585 FA19Str<sup>R</sup> *norM::kan* and the FA19Str<sup>R</sup> vs. FA19Str<sup>R</sup> *norM::kanC3* competitions did not show a  
586 statistical difference by the Mann-Whitney test, indicating that all strains competed similarly *in*  
587 *vivo*. C. No difference in the ability of the FA19Str<sup>R</sup> *norM::kan* mutant and the FA19Str<sup>R</sup>  
588 *norM::kanC3* complemented mutant to compete *in vivo* was observed. D. The FA1090 vs.  
589 FA1090*norM::kan* competitive experiment also did not show a difference in *in vivo* fitness  
590 between the tested strains.  
591

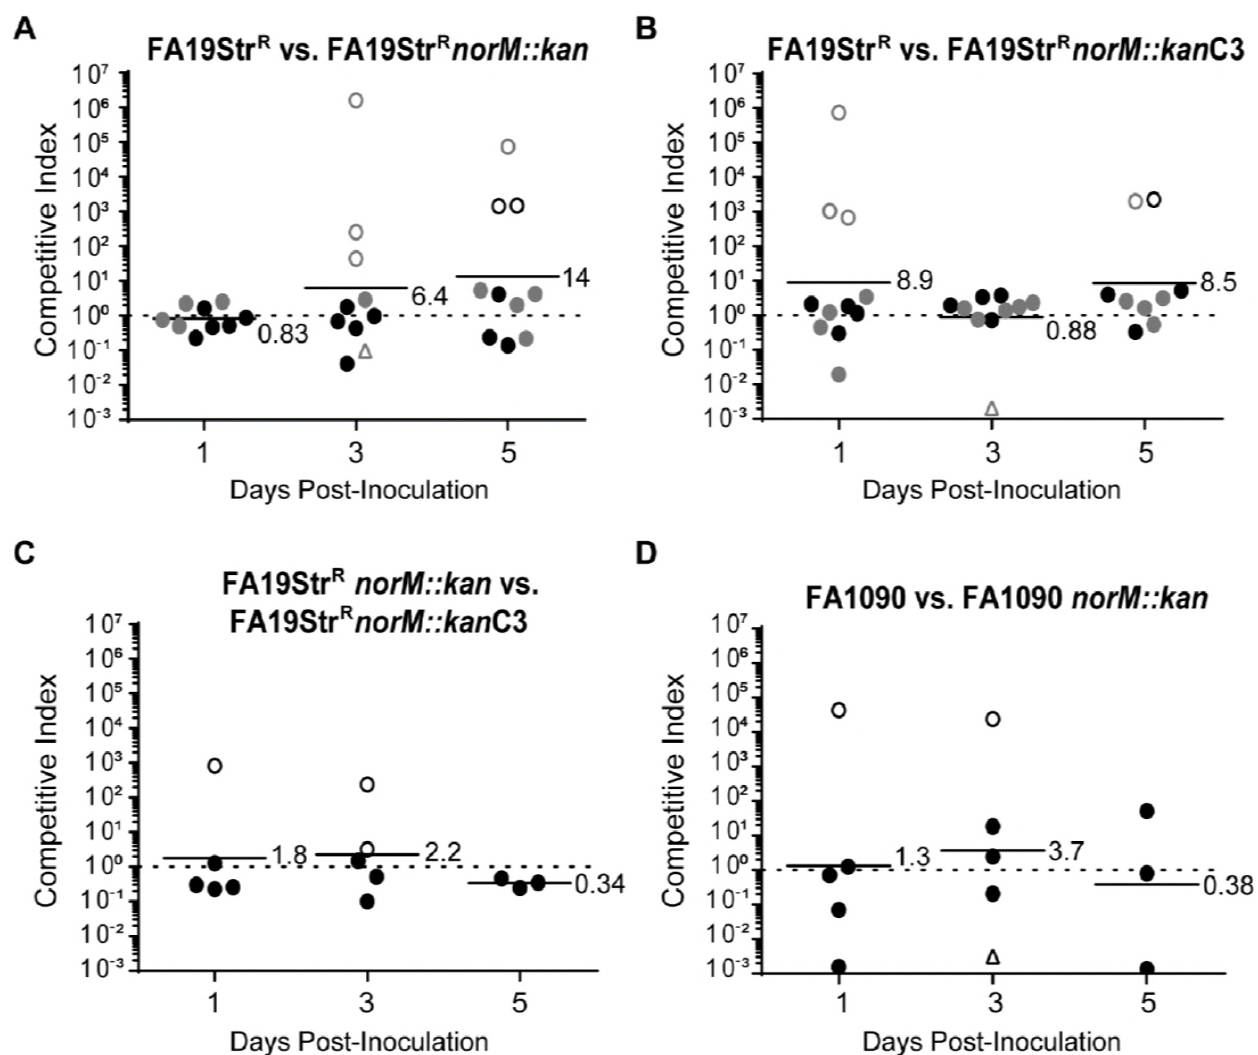

592

593 **Fig. S1.** Mutation of *norM* did not alter the *in vivo* fitness of *N. gonorrhoeae* strain FA19 or

594 FA1090 in the female mouse model of gonorrhea infection. Mice were inoculated vaginally with

595 similar numbers of wild-type bacteria and the mutant or complemented mutant strains. Results

596 are expressed as the competitive index (CI) for each mouse on each culture day (CI =1, equal

597 competition; CI <1, mutant strain attenuated; CI >1, mutant strain out-competed the wild-type

598 strain). The geometric mean of the CI values is shown and is represented by the bars. Open

599 circles indicate that only the mutant strain was recovered from the vaginal swabs at the indicated

600 time point. Open triangles indicate that only the wild-type strain was recovered from the vaginal

601 swabs at the indicated time point. A. The FA19Str<sup>R</sup> *norM::kan* mutant and B. FA19Str<sup>R</sup>



602 *norM::kanC3* complemented mutant exhibited similar fitness as wild-type FA19Str<sup>R</sup> bacteria in  
603 *vivo*. Pairwise analyses of competitive indices from days 1, 3, and 5 of the FA19Str<sup>R</sup> vs.  
604 FA19Str<sup>R</sup> *norM::kan* and the FA19Str<sup>R</sup> vs. FA19Str<sup>R</sup> *norM::kanC3* competitions did not show a  
605 statistical difference by the Mann-Whitney test, indicating that all strains competed similarly *in*  
606 *vivo*. C. No difference in the ability of the FA19Str<sup>R</sup> *norM::kan* mutant and the FA19Str<sup>R</sup>  
607 *norM::kanC3* complemented mutant to compete *in vivo* was observed. D. The FA1090 vs.  
608 FA1090*norM::kan* competitive experiment also did not show a difference in *in vivo* fitness  
609 between the tested strains.  
610



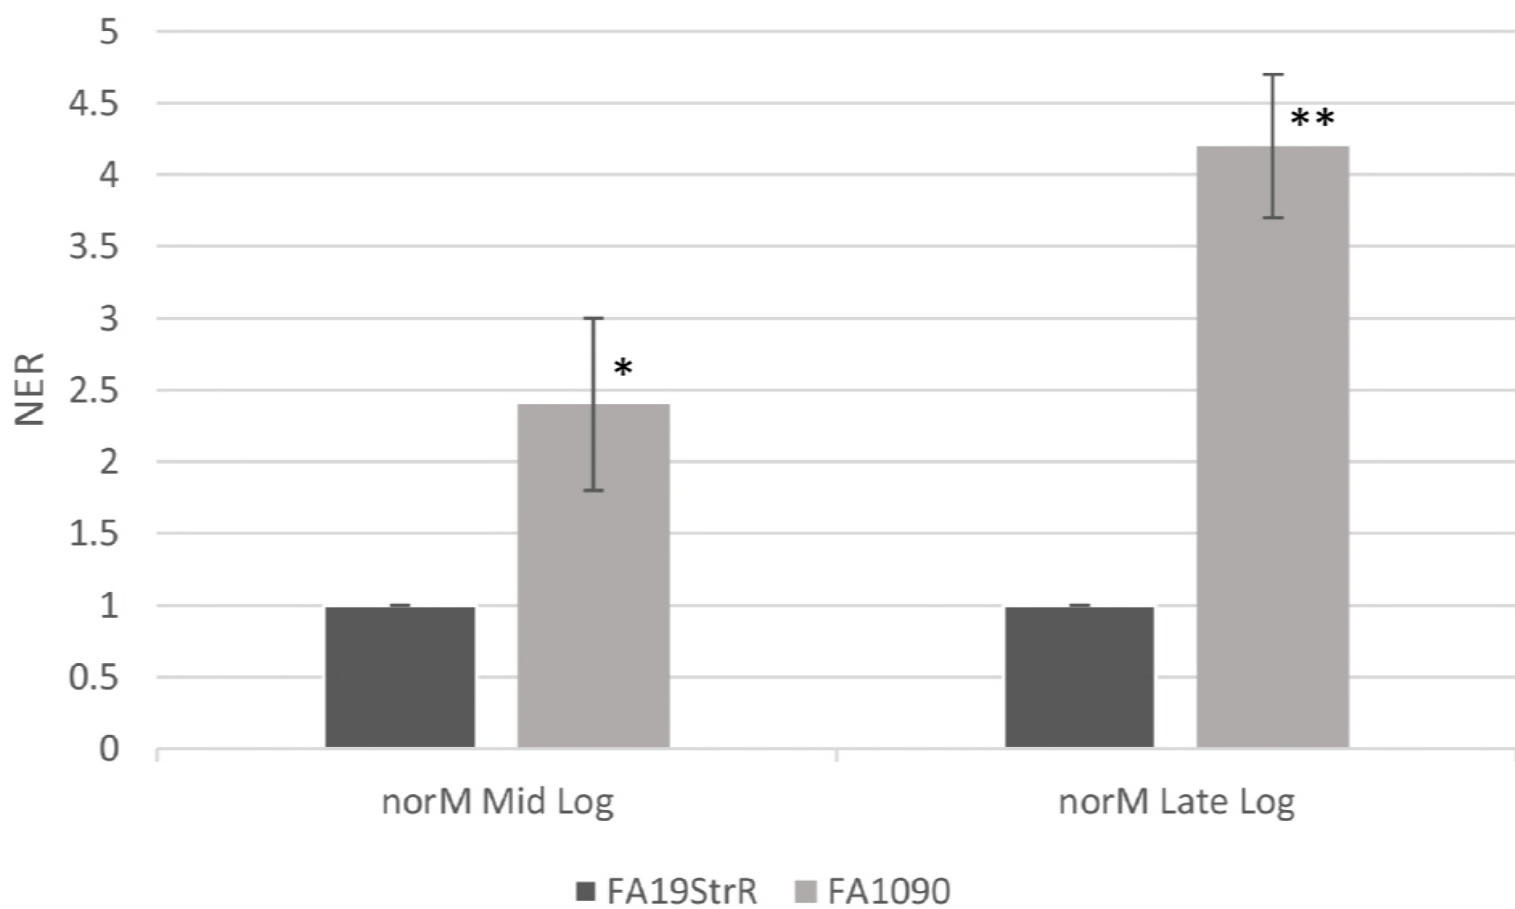

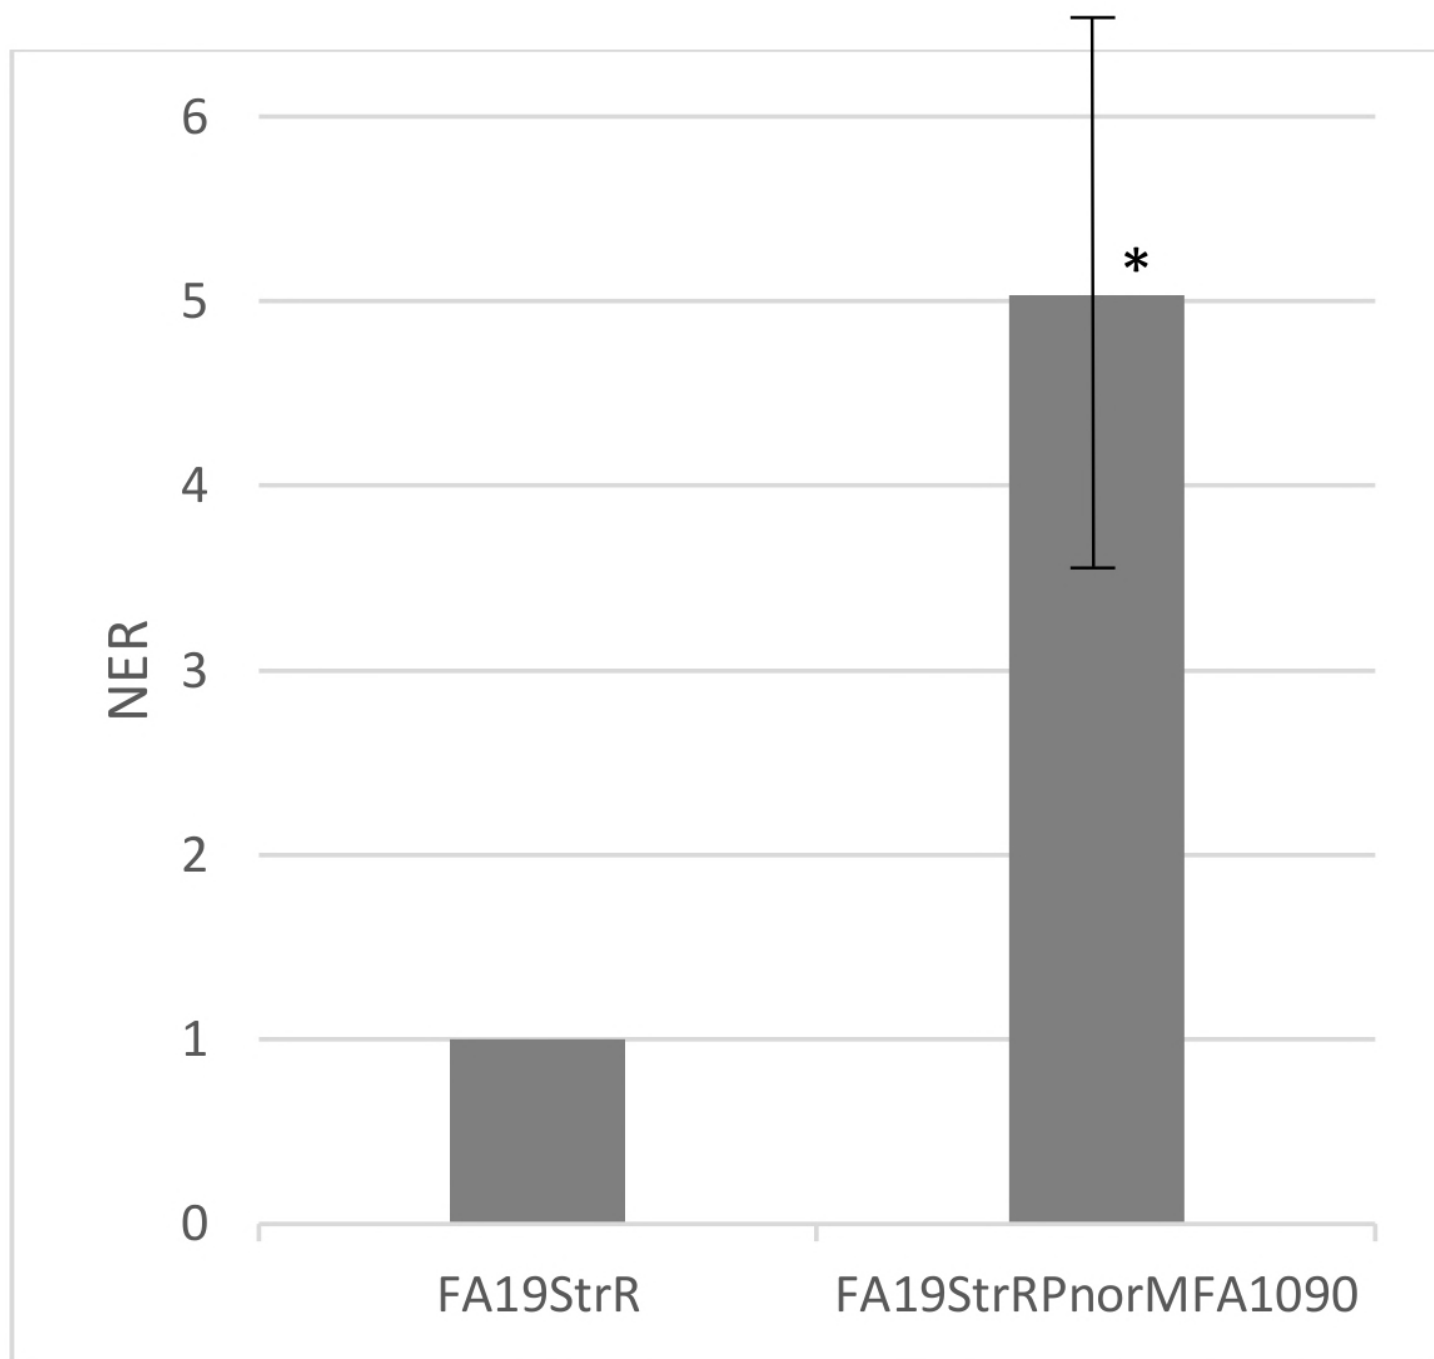

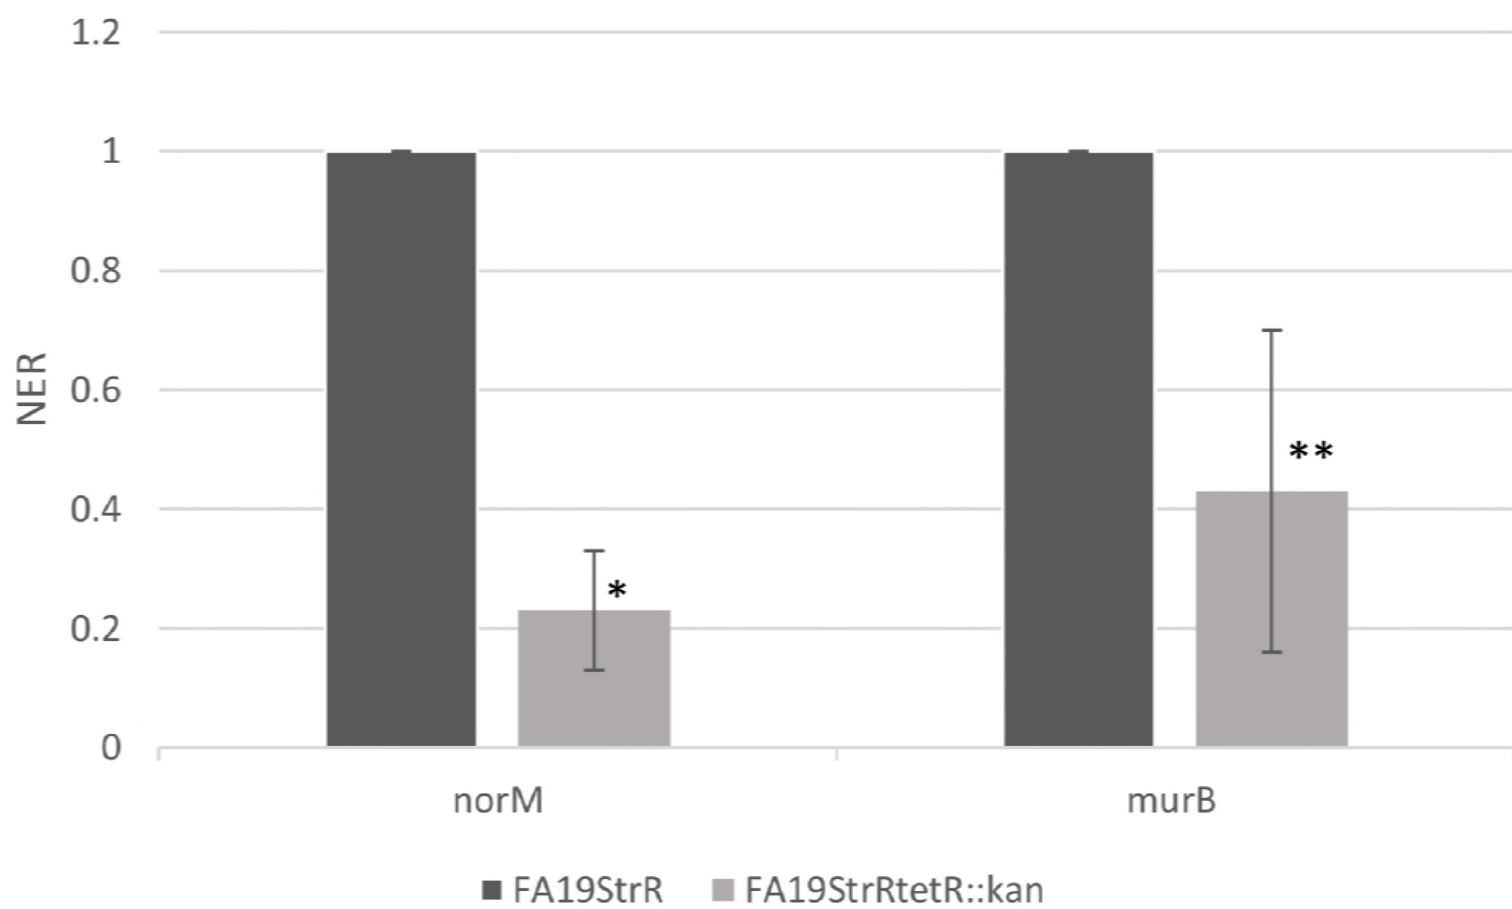

1 2 3 4 5 6 7 8

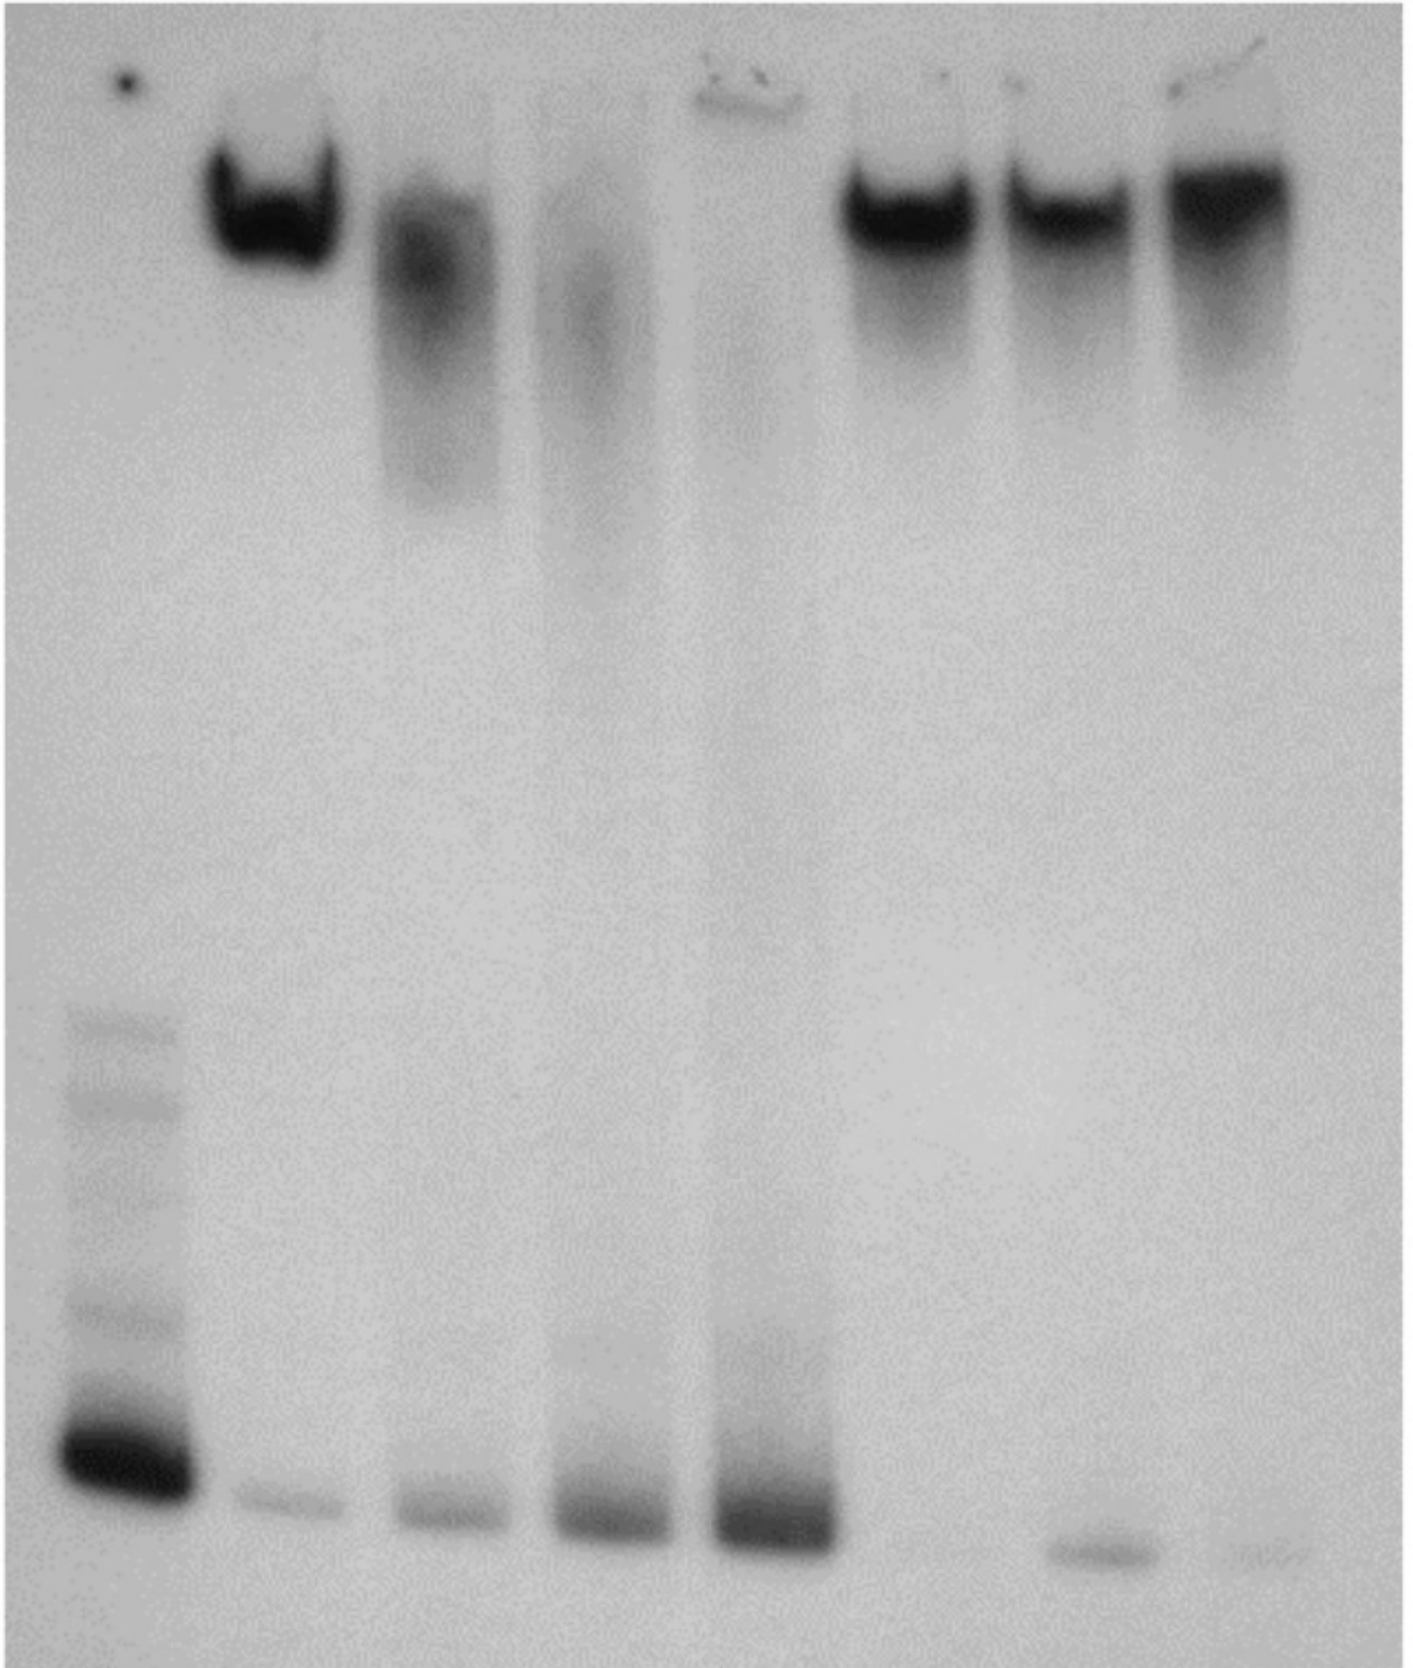

Source: https://www.biorxiv.org/content/10.1101/308031v1.full.pdf
